# Supplementary material
Source: Springer Nature journal article supplement (https://www.springermedizin.de/resource/supplementary/13024_2012_358_MOESM4_ESM.pdf/9643822)

**A**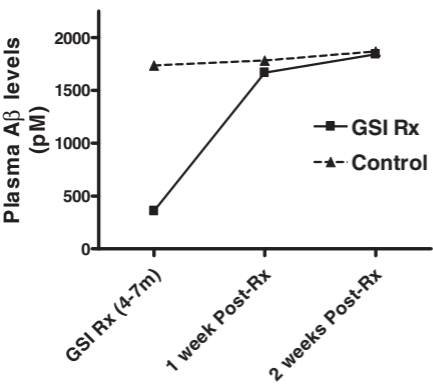**B**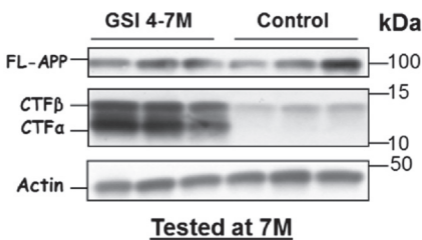**C**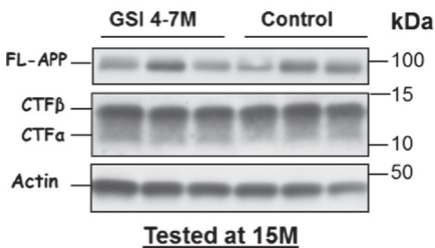**D**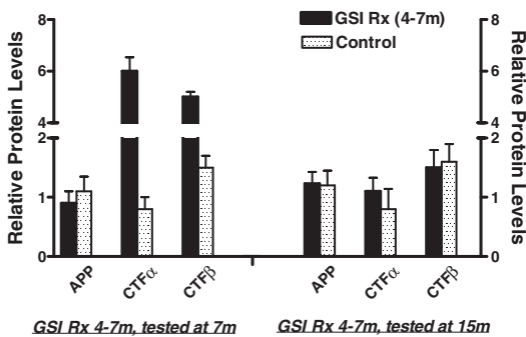

Supplement: MOESM4 [file 9643822]
